# Supplementary material for: Establishing cut-points for physical activity classification using triaxial accelerometer in middle-aged recreational marathoners
Source: PLoS One. 2018 Aug 29;13(8):e0202815. doi: 10.1371/journal.pone.0202815 (PMC6114871; doi:10.1371/journal.pone.0202815)
Supplement: S2 File — (XLSX) [file pone.0202815.s002.xlsx]

## Sheet: Hoja1
Sexo	0	0	0	1	1	2	1	1	1	1	1	1	1	1	1	1	1	1	1	1	1	1	1	1	1	1	1	1	1	1	1	1	1	1	1	1	1	1	1	1	1	1	1	1	1	1	1	1	1
			0	1	2	3	4	5	6	7	8	9	10	11	12	13	14	15	16	17	18	19	20	21	22	23	24	25	26	27	28	29	30	31	32	33	34	35	36	37	38	39	40	41	42	43	44	45	46
	Minuto	Km.h	METsGlobalMinuto	METs001	METs002	METs003	METs004	METs005	METs006	METs007	METs008	METs009	METs010	METs011	METs012	METs013	METs014	METs015	METs016	METs017	METs018	METs020	METs021	METs022	METs023	METs024	METs025	METs026	METs027	METs028	METs029	METs030	METs031	METs032	METs033	METs034	METs035	METs036	METs037	METs038	METs039	METs040	METs041	METs042	METs043	METs044	METs045	METs046	METs047
	0	0.012987	1.464	1.08009	0.754441	0.227964	1.09178	1.42343	0.913149	1.44004	1.67192	1.06832	1.15341	2.02522	2.71263	0.856721	1.84824	1.13889	1.9349	1.29032	1.70653	1.7928	1.12037	2.83956	1.11888	1.90476	2.26415	2.00831	1.98242	1.98299	1.22227	2.08375	1.46628	1.06544	0.613706	0.951198	1.19905	1.67401	2.4778	1.04773	1.61324	1.13228	0.904959	0.793849	1.16004	1.68319	1.26039	1.77636	1.53789
	1	0.462626	1.4371	0.815162	1.56242	0.643364	1.46188	3.17061	1.16071	3.09562	1.15367	2.76605	2.72145	1.39657	2.1057	1.22811	1.5939	2.96032	1.23418	1.24424	0.948072	3.10401	1.2828	1.45055	1.22278	2.18303	1.28661	1.37825	1.09544	1.03061	1.5687	1.31437	1.32803	1.33679	1.37743	1.05058	1.13969	1.24187	1.31558	1.73703	1.18815	1.39683	1.39103	0.947613	1.50806	1.71429	1.66634	1.48841	1.45266
	2	5.89596	2.73093	1.98492	3.20273	2.0618	2.92006	4.71223	2.45942	5.09058	2.15412	5.01449	4.02563	2.7141	2.78282	3.0555	2.43747	4.34127	3.1962	2.48848	2.98643	6.75435	3.03623	2.73407	3.04895	2.92377	2.36119	2.54649	2.36665	2.09864	2.24212	2.47245	2.18266	3.20431	2.64235	2.66548	2.38227	2.25718	3.03471	2.81578	2.91638	2.39506	2.66746	2.0919	2.89581	3.44801	2.81848	2.46073	2.89049
	3	5.97374	4.70118	2.76748	5.42711	4.20973	4.37824	5.35971	4.41558	5.42078	5.35827	5.22981	4.45156	3.86975	4.13295	4.62967	4.67571	4.86508	4.16817	4.66359	4.32665	6.71793	4.46481	4.50989	5.22278	4.83637	4.45283	4.32291	4.54118	4.36054	4.72557	4.04729	4.08881	5.35914	4.83464	4.20586	4.66165	4.37592	4.79822	4.37015	6.50174	4.61728	4.65521	4.70588	4.88507	5.86978	4.74	4.58489	6.14045
	4	6.17576	5.30219	3.41553	5.69482	4.72644	5.14064	6.37205	5.01218	6.45723	5.11041	7.10559	5.22427	4.64521	4.87614	5.38088	5.20983	5.99206	5.05425	5.28571	5.15406	6.53177	5.18534	5.14286	5.37463	5.64766	5.06379	5.18486	4.79052	4.60884	4.97081	5.04107	5.36238	5.57861	5.41084	4.86247	5.05738	5.12691	5.57304	4.93882	6.38328	4.90653	4.8607	5.29233	5.44361	6.78328	4.79799	5.11967	6.69261
	5	8.07273	6.40411	5.65722	7.07715	5.72948	6.18801	9.10586	5.69399	9.36941	5.84498	10.3271	7.66679	5.13458	6.07762	6.68073	5.922	8.9881	6.22966	6.37788	6.08059	9.0085	6.07663	5.91209	7.23277	6.55693	5.67116	5.63553	6.10668	5.32653	6.09186	5.69024	6.40972	5.77813	6.32799	6.02662	6.49387	6.27229	6.31961	6.82061	7.25784	5.83069	5.97906	5.96817	6.1826	7.21088	5.72202	6.43605	7.0076
	6	9.11818	8.66368	8.48176	9.90022	8.1307	8.35307	9.80987	8.29545	10.4471	8.35962	11.2836	8.94459	7.57388	8.5673	8.84997	8.6011	9.9246	8.7387	8.7788	7.81297	10.0607	8.11329	8.61978	9.53846	8.51656	8.28751	7.60009	8.78806	7.62925	8.12768	8.03045	8.29912	8.56744	9.14081	8.20586	8.92758	8.82316	9.09605	9.06083	9.64808	8.65961	8.14464	8.61076	8.89796	10.2391	8.50184	8.41436	9.28664
	7	10.099	9.58174	9.29692	11.2095	9.45289	9.03775	10.1131	9.30195	11.4653	9.70257	12.1035	9.67584	8.46979	8.69942	9.8122	9.11827	10.7778	9.93219	9.60829	8.74381	10.7972	9.05456	9.75824	10.002	9.72761	9.02066	8.74207	9.63826	8.72789	9.15921	9.40493	9.04902	10.5946	10.1637	9.28483	9.82984	9.30984	9.77401	10.3912	10.1324	9.54497	9.29856	9.65135	9.86896	11.6735	9.47226	9.12117	10.1501
	8	11.0525	10.3232	10.108	11.5697	10.1469	9.78164	11.1614	10.3247	12.2357	10.4687	12.7619	10.1545	9.26783	9.2692	10.3777	9.81348	11.7738	10.8996	10.3871	9.74359	12.072	9.8459	10.6374	10.8611	10.2802	9.89757	9.56465	10.6111	9.41156	9.96107	10.1182	9.89946	11.0774	11.1251	9.96628	11.0645	9.84686	10.5569	11.0529	11.1115	10.0529	10.1759	10.3844	10.7798	12.4742	9.97487	9.97382	10.7689
	9	11.8919	11.054	10.3566	12.8304	10.9271	10.8771	11.9938	10.8563	12.7952	11.3925	13.2215	10.9461	10.0094	9.99174	11.4581	10.8097	12.5675	11.3336	11.1889	10.6313	12.756	10.8996	11.6132	11.6883	11.3972	10.6343	10.4572	11.3386	10.2381	10.8447	10.9998	10.8756	11.2011	11.9775	11.0772	11.7412	10.6272	4.75787	11.8284	11.8223	10.8466	10.6975	11.3356	11.5489	13.3411	10.6244	10.9499	11.347
	10	11.9152	11.6774	10.8131	13.4631	11.2361	11.7246	11.9476	11.4002	13.208	11.9829	13.9545	11.3155	10.9505	10.4707	12.2135	11.5812	12.7063	12.057	11.9493	11.239	12.9462	11.6826	12.6462	12.3237	12.283	11.5112	11.3061	11.9926	10.9082	11.5765	11.7451	11.6045	12.0112	12.7344	11.496	12.4218	11.2356	11.5496	12.4384	12.9199	11.8801	11.725	11.9113	12.5972	14.0914	11.4247	11.2565	11.814
	11	12.1485	12.0104	11.1596	13.7503	11.5299	11.7432	12.3433	11.6153	13.6116	12.2758	14.3313	11.5869	10.8338	11.0033	12.3402	11.9627	13.0159	12.3508	12.8571	11.5363	12.7641	12.5448	12.8571	12.7273	12.4358	11.6873	11.4636	12.4382	11.102	11.6621	12.2701	11.9145	12.1389	13.1606	11.9965	12.7028	11.374	12.732	12.7658	13.3484	12.4268	12.0411	12.2439	12.5285	14.3285	11.7572	11.7053	12.444
	12	13.1162	12.2871	11.7913	14.0862	11.8744	12.0244	13.0884	11.9927	14.194	12.447	14.6791	12.3483	11.1839	11.1189	12.5807	12.0983	13.7262	12.4367	12.53	12.0577	13.8567	12.8405	13.0593	13.1588	12.4162	12.0791	11.5686	12.2052	11.3231	11.9813	12.3983	12.0947	12.091	13.3242	11.9397	13.1262	11.8481	12.5787	13.269	13.6167	12.7549	12.3098	12.3082	12.8679	14.3829	11.7417	11.8998	12.6774
	13	14.1134	12.8996	12.4434	14.8065		12.7942	13.7667	12.2849	15.2305	12.8887	15.0725	13.3735	11.8389	11.9075	13.4374	12.5011	14.8849	12.9611	13.424	12.4801	14.4962	13.4486	13.7319	13.6543	13.1335	12.5355	12.3255	13.0636	11.8435	12.4912	12.9313	12.8697	12.7454	13.9345	12.6531	13.3993	12.532	13.6965	13.6791	14.3101	13.3757	12.9184	13.0449	13.5983	15.2925	12.2791	12.543	12.8368
	14	15.0911	13.6376	12.957	14.349		13.4974	14.6249	12.8734	16.5283	13.5602	15.6232		12.6558	12.9108	14.2055	13.4845	15.5159	13.4539	13.8387	13.1394	15.427	14.1108	14.3341	14.6733	14.1093	13.2686	12.5618	13.7053	12.7075	13.0479	13.7047	13.628	13.9904	14.6471	13.2564	13.8544	13.0145	14.2575	14.2237	15.216	14.709	13.7167	13.6671	14.3502	15.9767	13.1142	13.347	13.6001
	15	15.9921	14.3558	13.4379	16.3203		14.4708	15.4676	13.2386	16.5375	14.3578			13.4124	13.8481	15.3408	14.5231	16.254	13.8653	14.6406	13.9453	16.3092		15.0681	15.9361	15.3831	13.8616	12.9775	14.3797	13.4014	13.4527	14.458	14.1935	14.5172		13.913	14.5983	13.4508	15.5811		16.1463	15.6226	14.7678	14.4216	15.0118	16.6842	13.613	13.8108	14.4488
	16	17.1442	15.1283	13.8129	17.0942		15.5885	16.3875			16.3317			13.9545	14.7069	16.2904	14.9385	17.0516	14.2767	15.1382	14.8804	16.6006			16.7872	16.4805	14.1995		15.0582	13.9082	13.9548	15.0391	14.9728	15.2394		14.7471		13.8242	16.1784			16.3986	15.6807		15.7938	17.2362	13.8914		14.8416
	17	18.0353	16.2879		17.6296		16.4915				17.2195			14.5003	15.4211	17.0542	15.4599				15.4751	17.414			17.8941	17.4172							15.9363	15.8978					16.8886										15.2603
	18	19	16.7249												15.9785											18.1423								16.5523
[truncated: 151 more columns]
